# Supplementary material
Source: PubMed Central journal article supplement (PMC4361249)

# **Hydrogen Sulfide Attenuates High Fat Diet-Induced Cardiac Dysfunction via the Suppression of Endoplasmic Reticulum Stress**

Larry A. Barr, Yuuki Shimizu, Jonathan P. Lambert, Chad K. Nicholson, John W. Calvert

Department of Surgery, Division of Cardiothoracic Surgery, Carlyle Fraser Heart Center, Emory University School of Medicine, Atlanta, GA, USA

## **Correspondence:**

John W. Calvert, Ph.D.  
Department of Surgery  
Division of Cardiothoracic Surgery  
Carlyle Fraser Heart Center  
Emory University School of Medicine  
380 Northyards Boulevard, Suite B  
Atlanta, GA 30313  
Phone: 404-251-0663  
jcalver@emory.edu

**Key Words:** diabetes; diabetic cardiomyopathy; hydrogen sulfide; ER stress

**Supplemental Figure Legend**

**Supplemental Fig 1.** Representative immunoblots and densitometric analysis of GAPDH. All samples were collected from the hearts of control, HFD, HFD-S, and HFD-D mice following 24 weeks of HFD feeding. Results are expressed as mean  $\pm$  SEM. \*\* $p < 0.01$  vs. Control.

**Supplemental Fig 2.** Intraperitoneal glucose tolerance (A) and area-under the curve analysis of glucose tolerance test (B) in control, HFD, HFD-S, and HFD-D mice following 24 weeks of HFD feeding. Results are expressed as mean  $\pm$  SEM. \* $p < 0.05$  and \*\*\* $p < 0.001$  vs. Control.

# Supplemental Figure 1

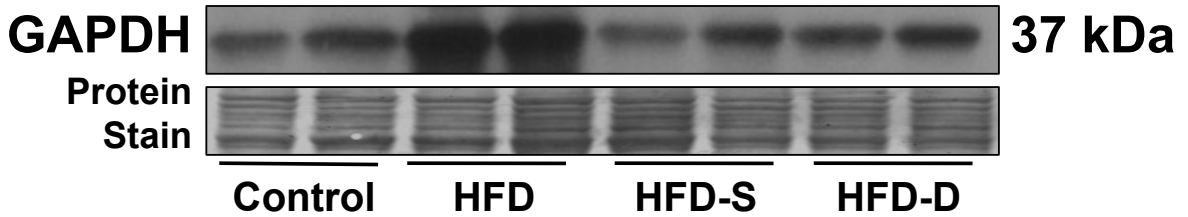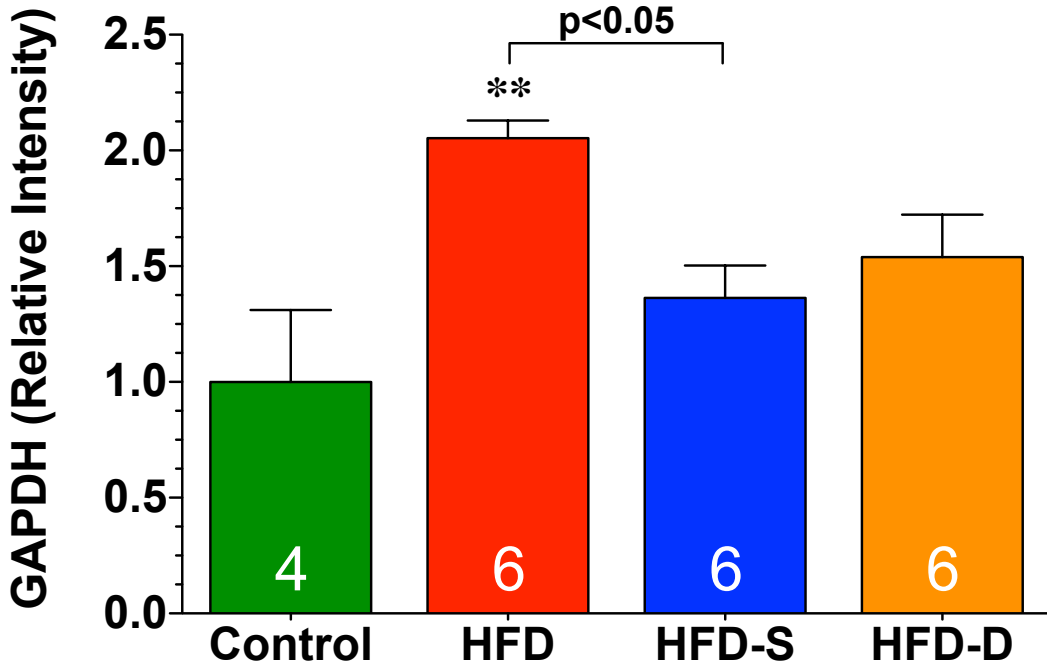

## Supplemental Figure 2

### A.

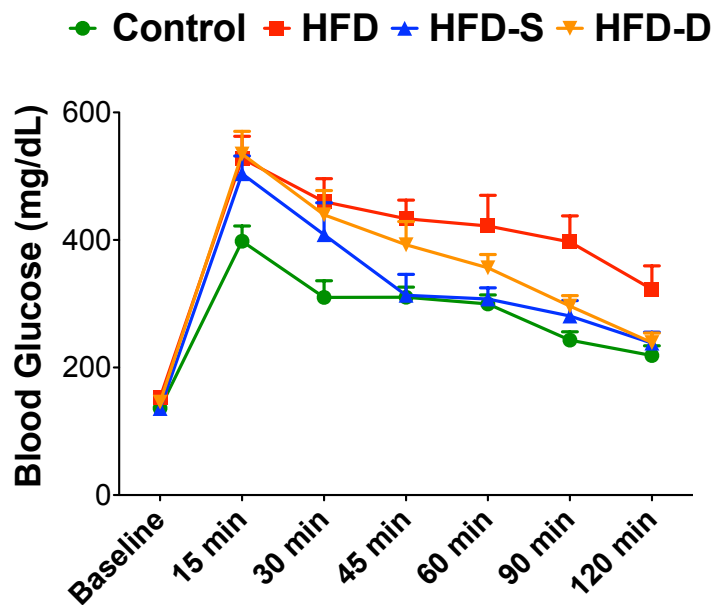

### B.

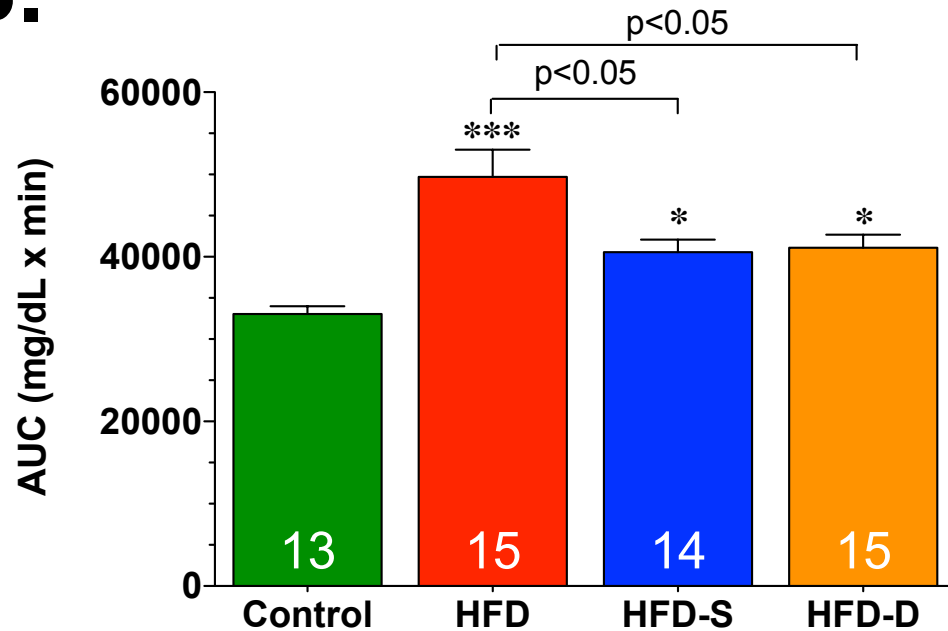

Supplement: NIHMS653608-supplement-2.pdf [file NIHMS653608-supplement-2.pdf]
